# Supplementary material for: Suppression Analysis of esa1 Mutants in Saccharomyces cerevisiae Links NAB3 to Transcriptional Silencing and Nucleolar Functions
Source: PubMed Central journal article supplement (PMC3464115; doi:10.1534/g3.112.003558), 2012-10-01
Supplement: supp_2.10.1223_003558SI.pdf [file supp_2.10.1223_003558SI.pdf]

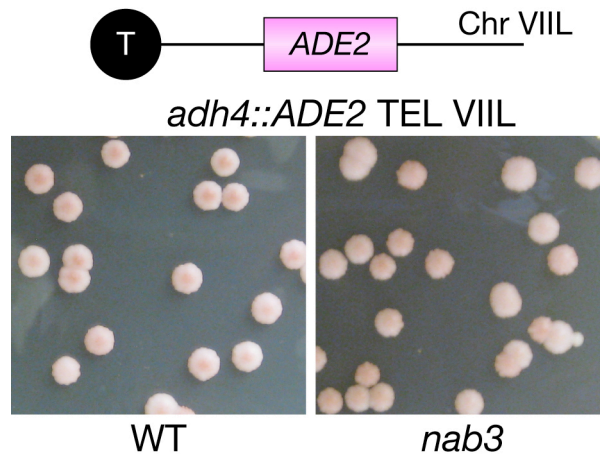

**Figure S1** Mutants of *nab3* do not display a telomeric silencing defect with an *ADE2* reporter at the left arm of chromosome VII. WT (LPY11300) and *nab3* (LPY11286) strains with the *adh4::ADE2* TEL VIII reporter were grown up overnight in YPD liquid cultures, and plated for single colonies on YPD. After 3 days growth at 30°, plates were incubated for one month at 4° for pink color development before images were captured.

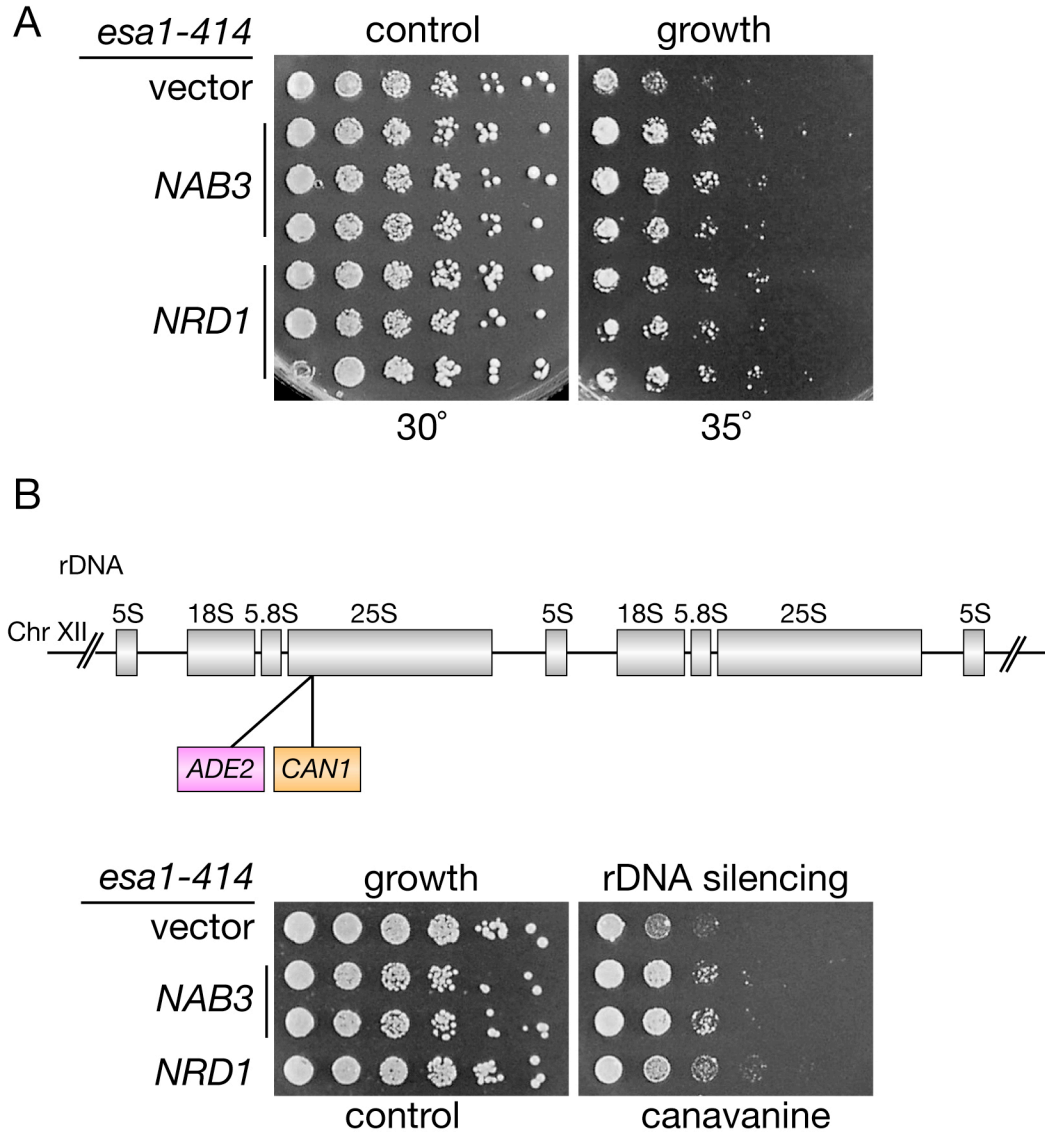

**Figure S2** Overexpression of *NRD1* suppresses *esa1* phenotypes. A) Overexpression of *NRD1* suppresses the temperature-sensitivity of an *esa1* mutant. The *esa1* strain (LPY3291) was transformed with vector (pLP362), *NAB3* (pLP2018), or *NRD1* (pLP2054) 2-micron plasmids. Transformants were plated on SC-Ura-Trp at 30° for growth and 35° to observe suppression. B) Overexpression of *NRD1* suppresses the rDNA silencing defect of an *esa1* mutant. An *esa1* strain with the rDNA::*ADE2-CAN1* reporter was transformed with vector (pLP362), *NAB3* (pLP2018), or *NRD1* (pLP2054) 2-micron plasmids. Transformants were plated on SC-Ade-Arg-Ura with and without 32 µg/ml canavanine to assay for rDNA silencing.

**Table S1 The allele-specific suppression of *esa1* phenotypes**

Temperature-sensitive suppression

| <b>allele</b>     | <b><i>NAB3</i></b> | <b><i>LYS20</i></b> | <b><i>LEU2</i></b> | <b><i>VAP1</i></b> |
|-------------------|--------------------|---------------------|--------------------|--------------------|
| <i>esa1-414</i>   | +++                | ++                  | ++                 | ++++               |
| <i>esa1-L254P</i> | -/+                | +                   | ++                 | +                  |
| <i>esa1-L327S</i> | -/+                | -/+                 | -/+                | ++                 |

rDNA silencing suppression

| <b>allele</b>     | <b><i>NAB3</i></b> | <b><i>LYS20</i></b> | <b><i>LEU2</i></b> | <b><i>VAP1</i></b> |
|-------------------|--------------------|---------------------|--------------------|--------------------|
| <i>esa1-414</i>   | +++                | -                   | -/+                | -/+                |
| <i>esa1-L254P</i> | +++                | -                   | not tested         | not tested         |

- + indicates suppression of *esa1* phenotype (+++ signifies stronger suppression)
- /+ indicates no change in *esa1* phenotype
- indicates exacerbation of *esa1* phenotype
