# Supplementary material for: Suppression Analysis of esa1 Mutants in Saccharomyces cerevisiae Links NAB3 to Transcriptional Silencing and Nucleolar Functions
Source: PubMed Central journal article supplement (PMC3464115; doi:10.1534/g3.112.003558), 2012-10-01
Supplement: supp_2.10.1223_TableS1.pdf [file supp_2.10.1223_TableS1.pdf]

**Table S1 The allele-specific suppression of *esa1* phenotypes**

Temperature-sensitive suppression

| <b>allele</b>     | <b><i>NAB3</i></b> | <b><i>LYS20</i></b> | <b><i>LEU2</i></b> | <b><i>VAP1</i></b> |
|-------------------|--------------------|---------------------|--------------------|--------------------|
| <i>esa1-414</i>   | +++                | ++                  | ++                 | ++++               |
| <i>esa1-L254P</i> | -/+                | +                   | ++                 | +                  |
| <i>esa1-L327S</i> | -/+                | -/+                 | -/+                | ++                 |

rDNA silencing suppression

| <b>allele</b>     | <b><i>NAB3</i></b> | <b><i>LYS20</i></b> | <b><i>LEU2</i></b> | <b><i>VAP1</i></b> |
|-------------------|--------------------|---------------------|--------------------|--------------------|
| <i>esa1-414</i>   | +++                | -                   | -/+                | -/+                |
| <i>esa1-L254P</i> | +++                | -                   | not tested         | not tested         |

- + indicates suppression of *esa1* phenotype (+++ signifies stronger suppression)
- /+ indicates no change in *esa1* phenotype
- indicates exacerbation of *esa1* phenotype
